# Supplementary material for: Low-Coordinate Mixed Ligand NacNac Complexes of Rare Earth Metals
Source: MDPI journal article supplement (doi:10.3390/molecules28041994), 2023-02-20
Supplement: s1 [file s1]

# Low-Coordinate Mixed Ligand NacNac complexes of Rare Earth metals

S. Klementyeva, T. Sukhikh, P. Abramov, A. Poddel'sky

Content:

|                                                                                                                                                                                                                                                                 |    |
|-----------------------------------------------------------------------------------------------------------------------------------------------------------------------------------------------------------------------------------------------------------------|----|
| <b>Figure S1.</b> The IR spectrum of (NacNac <sup>Mes</sup> )Dy(BIAN <sup>dipp</sup> ) ( <b>1</b> )                                                                                                                                                             | 2  |
| <b>Figure S2.</b> The IR spectrum of (NacNac <sup>Mes</sup> )Er(BIAN <sup>dipp</sup> ) ( <b>2</b> )                                                                                                                                                             | 2  |
| <b>Figure S3.</b> The IR spectrum of (NacNac <sup>Mes</sup> )Y(BIAN <sup>dipp</sup> ) ( <b>3</b> )                                                                                                                                                              | 3  |
| <b>Figure S4.</b> The IR spectrum of (NacNac <sup>Mes</sup> )Dy(AP <sup>dipp</sup> ) ( <b>4</b> )                                                                                                                                                               | 3  |
| <b>Figure S5.</b> The IR spectrum of (NacNac <sup>Mes</sup> )Er(AP <sup>dipp</sup> ) ( <b>5</b> )                                                                                                                                                               | 4  |
| <b>Figure S6.</b> The IR spectrum of (NacNac <sup>Mes</sup> )Y(AP <sup>dipp</sup> ) ( <b>6</b> )                                                                                                                                                                | 4  |
| <b>Figure S7.</b> The <sup>1</sup> H NMR spectrum of (NacNac <sup>Mes</sup> )Y(BIAN <sup>dipp</sup> ) ( <b>3</b> ) (500 MHz, C <sub>6</sub> D <sub>6</sub> ).                                                                                                   | 5  |
| <b>Figure S8.</b> The <sup>1</sup> H NMR spectrum of (NacNac <sup>Mes</sup> )Y(AP <sup>dipp</sup> ) ( <b>6</b> ) (500 MHz, C <sub>6</sub> D <sub>6</sub> ).                                                                                                     | 5  |
| <b>Figure S9.</b> The <sup>13</sup> C{ <sup>1</sup> H} NMR spectrum of (NacNac <sup>Mes</sup> )Y(AP <sup>dipp</sup> ) ( <b>6</b> ) (125 MHz, C <sub>6</sub> D <sub>6</sub> ).                                                                                   | 6  |
| <b>Figure S10.</b> Crystal cell of (NacNac <sup>Mes</sup> )Dy(BIAN <sup>dipp</sup> ) ( <b>1</b> ) along a axis.                                                                                                                                                 | 7  |
| <b>Figure S11.</b> Crystal cell of (NacNac <sup>Mes</sup> )Er(BIAN <sup>dipp</sup> )·Toluene ( <b>2</b> ·Toluene) along a axis.                                                                                                                                 | 8  |
| <b>Figure S12.</b> Crystal cell of (NacNac <sup>Mes</sup> )Y(BIAN <sup>dipp</sup> )·Toluene ( <b>3</b> ·Toluene) along a axis.                                                                                                                                  | 9  |
| <b>Figure S13.</b> Crystal cell of (NacNac <sup>Mes</sup> )Dy(AP <sup>dipp</sup> )(THF)·0.5Hexane ( <b>4</b> ·0.5Hexane) along a axis.                                                                                                                          | 10 |
| <b>Figure S14.</b> Crystal cell of (NacNac <sup>Mes</sup> )Er(AP <sup>dipp</sup> )(THF) ( <b>5</b> ) along a axis.                                                                                                                                              | 11 |
| <b>Figure S15.</b> Crystal cell of (NacNac <sup>Mes</sup> )Y(AP <sup>dipp</sup> )(THF) ( <b>6</b> ) along a axis.                                                                                                                                               | 12 |
| <b>Table S1.</b> Crystal data and structure refinement for the compounds.                                                                                                                                                                                       | 13 |
| <b>Table S2.</b> Geometry analysis (SHAPE) of the tetracoordinated lanthanide polyhedra in <b>1–3</b>                                                                                                                                                           | 14 |
| <b>Table S3.</b> Geometry analysis (SHAPE) of the pentacoordinated lanthanide polyhedra in <b>4–6</b>                                                                                                                                                           | 14 |
| <b>Figure S16.</b> Overlay of the coordination polyhedron in complexes <b>4–6</b> (by the example of <b>6</b> ) and regular spherical square pyramid (a) and trigonal bipyramid (b) according to Continuous Shape Measures routine implemented in SHAPE program | 14 |

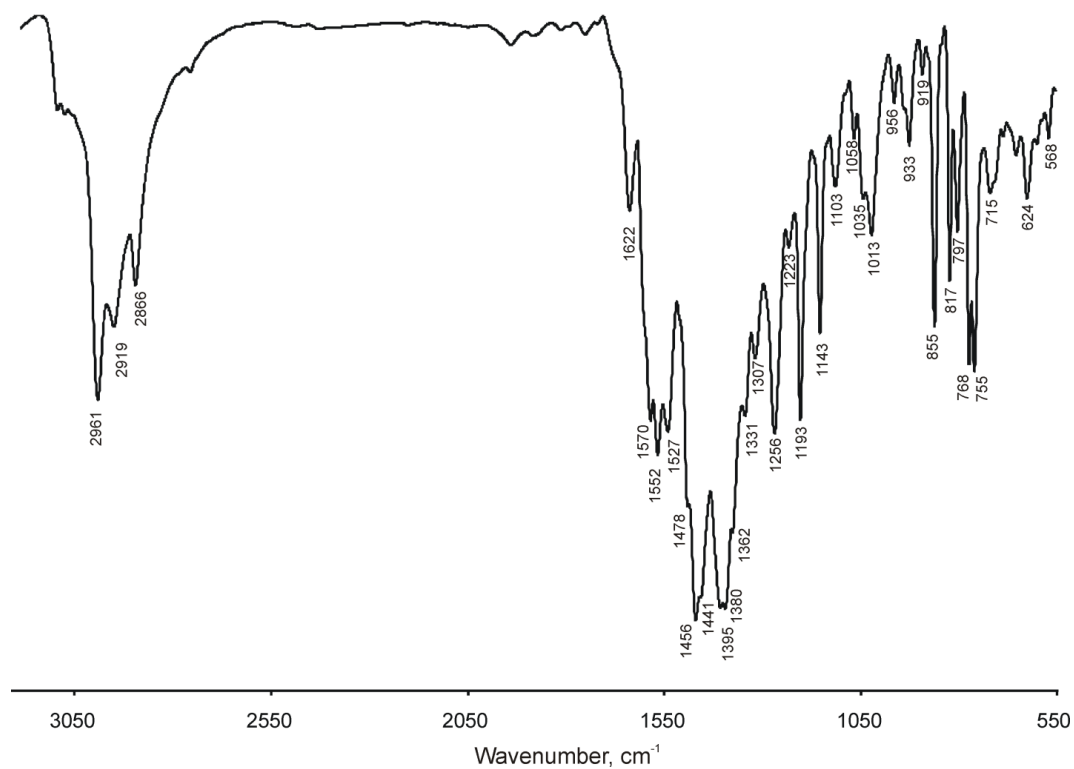

**Figure S1.** The IR spectrum of (NacNac<sup>Mes</sup>)Dy(BIAN<sup>dipp</sup>) (**1**) (3200-550 cm<sup>-1</sup>, KBr).

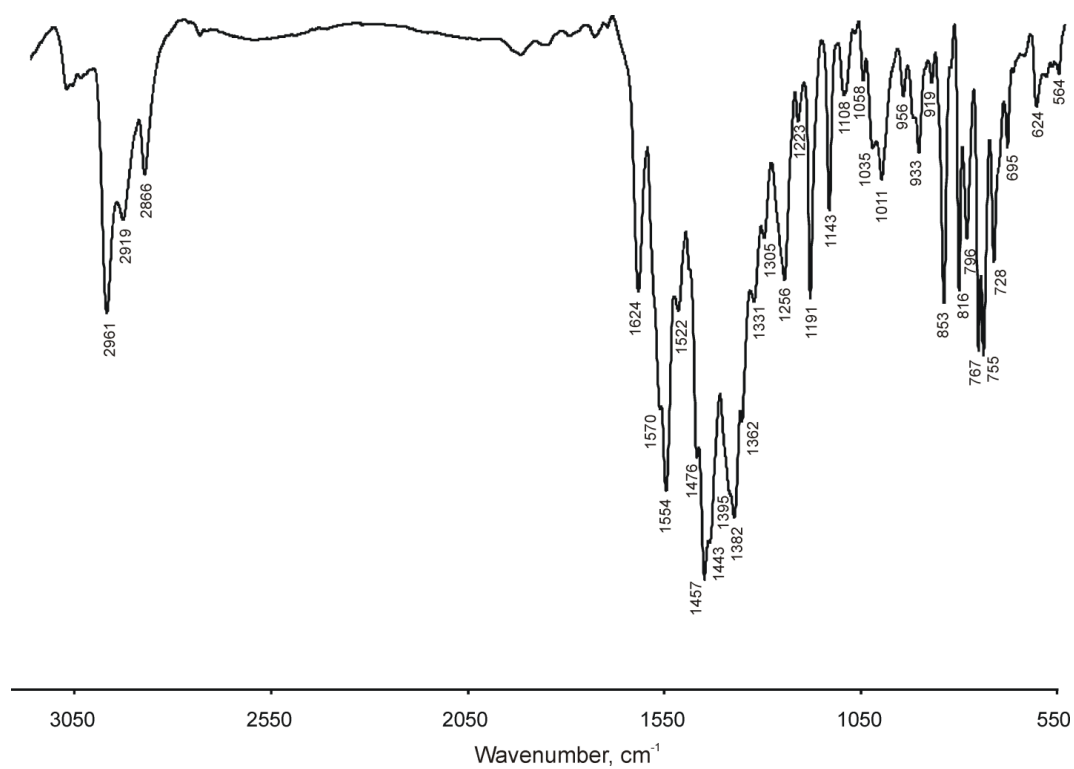

**Figure S2.** The IR spectrum of (NacNac<sup>Mes</sup>)Er(BIAN<sup>dipp</sup>) (**2**) (3200-550 cm<sup>-1</sup>, KBr).

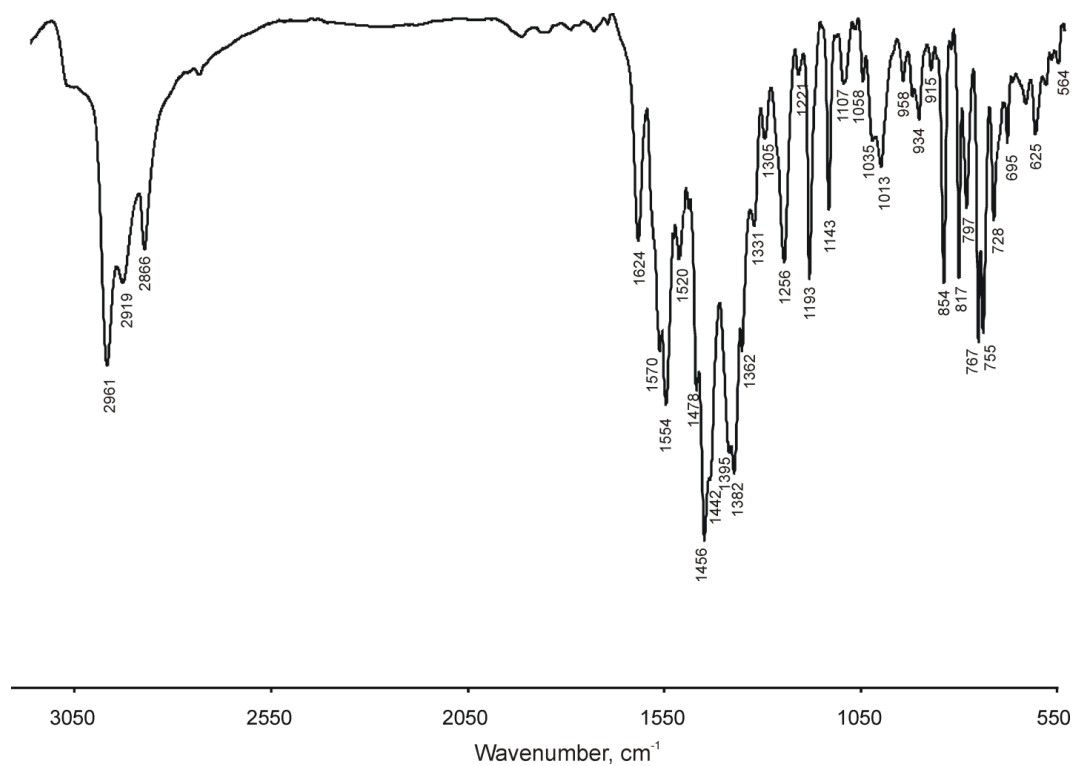

**Figure S3.** The IR spectrum of (NacNac<sup>Mes</sup>)Y(BIAN<sup>dipp</sup>) (**3**) (3200-550 cm<sup>-1</sup>, KBr).

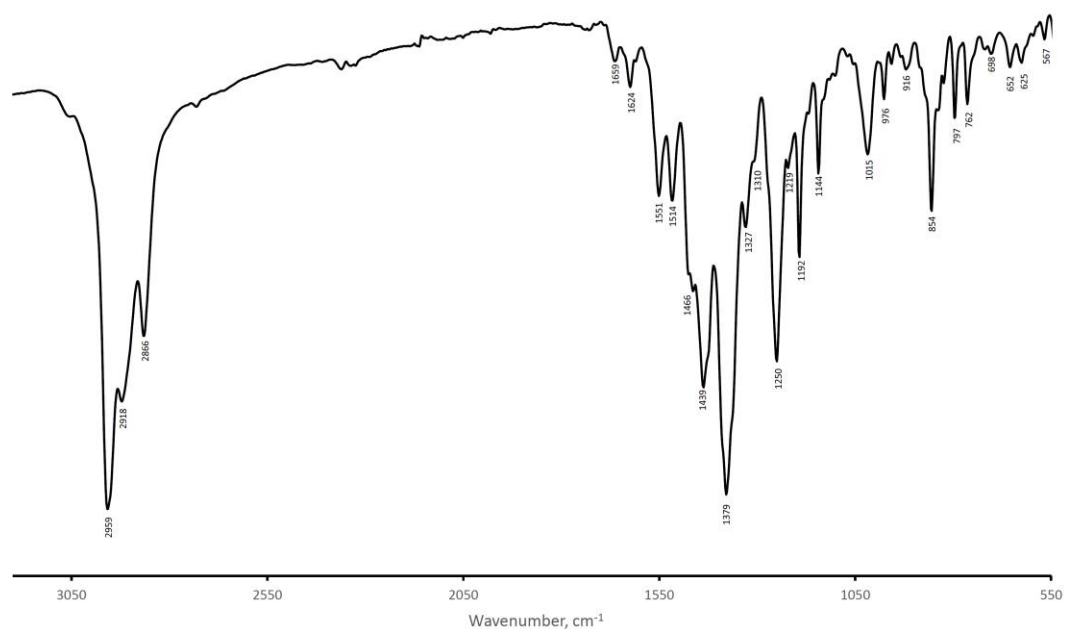

**Figure S4.** The IR spectrum of (NacNac<sup>Mes</sup>)Dy(AP<sup>dipp</sup>) (**4**) (3200-550 cm<sup>-1</sup>, KBr).

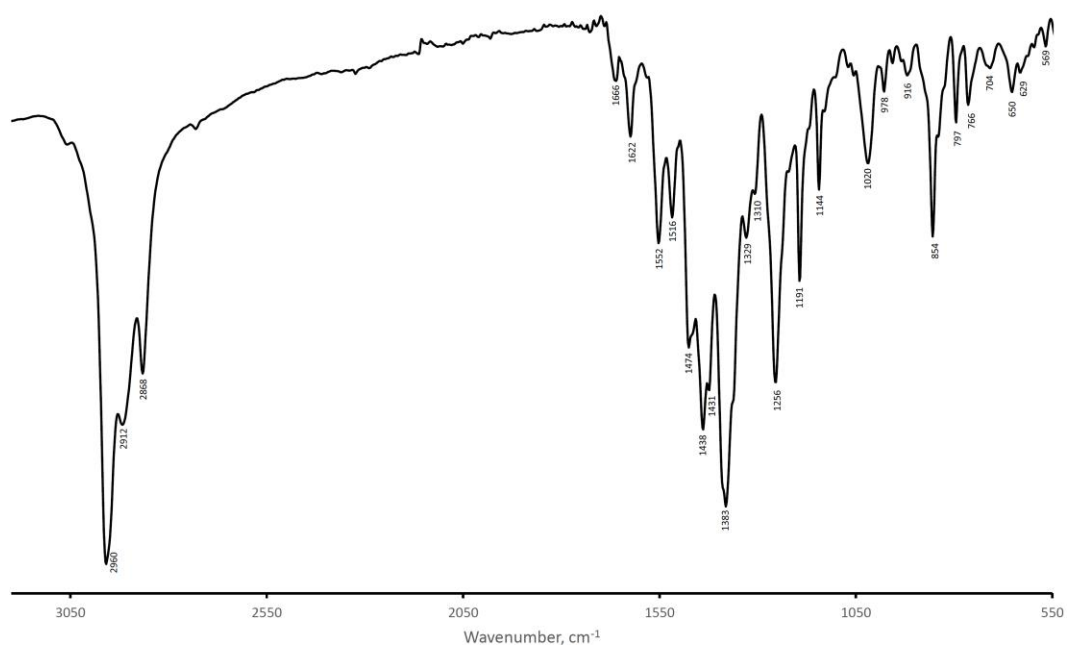

**Figure S5.** The IR spectrum of (NacNac<sup>Mes</sup>)Er(AP<sup>dipp</sup>) (**5**) (3200-550 cm<sup>-1</sup>, KBr).

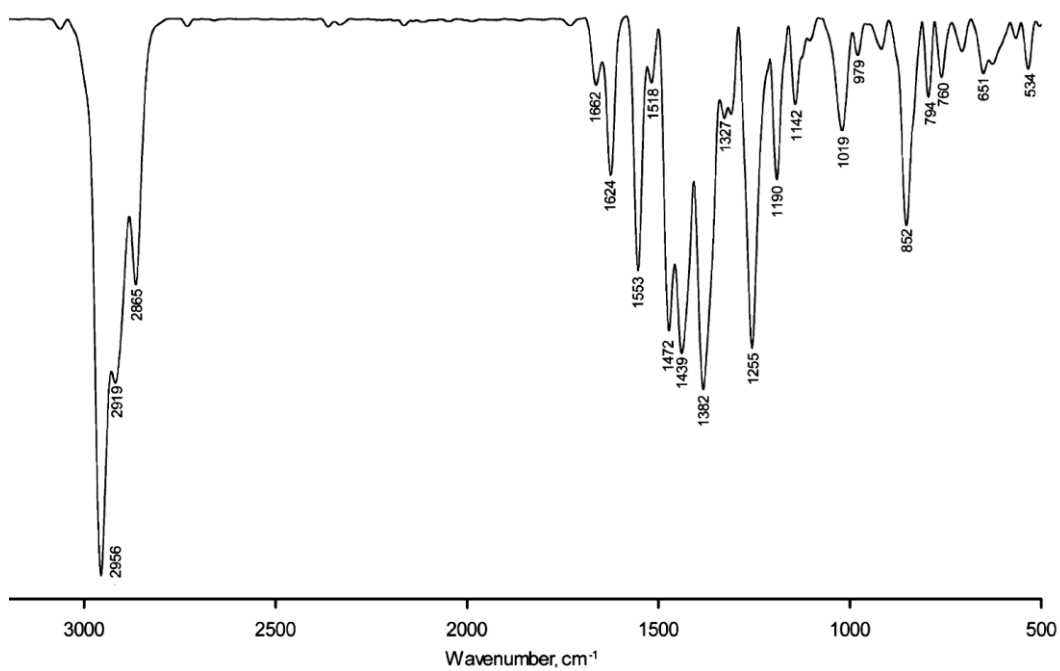

**Figure S6.** The IR spectrum of (NacNac<sup>Mes</sup>)Y(AP<sup>dipp</sup>) (**6**) (3200-500 cm<sup>-1</sup>, KBr).

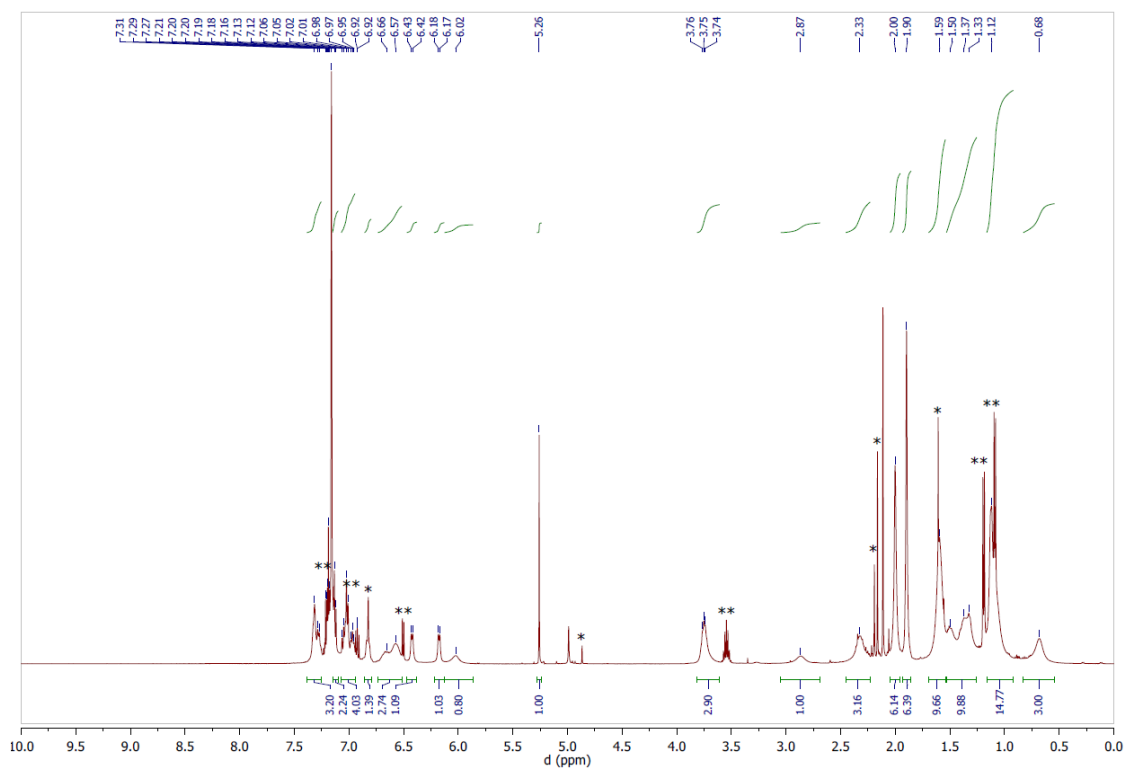

**Figure S7.** The <sup>1</sup>H NMR spectrum of (NacNac<sup>Mes</sup>)Y(BIAN<sup>dipp</sup>) (**3**) (500 MHz, C<sub>6</sub>D<sub>6</sub>). \* the peaks of NacNac<sup>Mes</sup>H and \*\* the peaks of BIAN<sup>dipp</sup> as impurities due to an extremely high sensitivity of complex to oxygen and moisture traces.

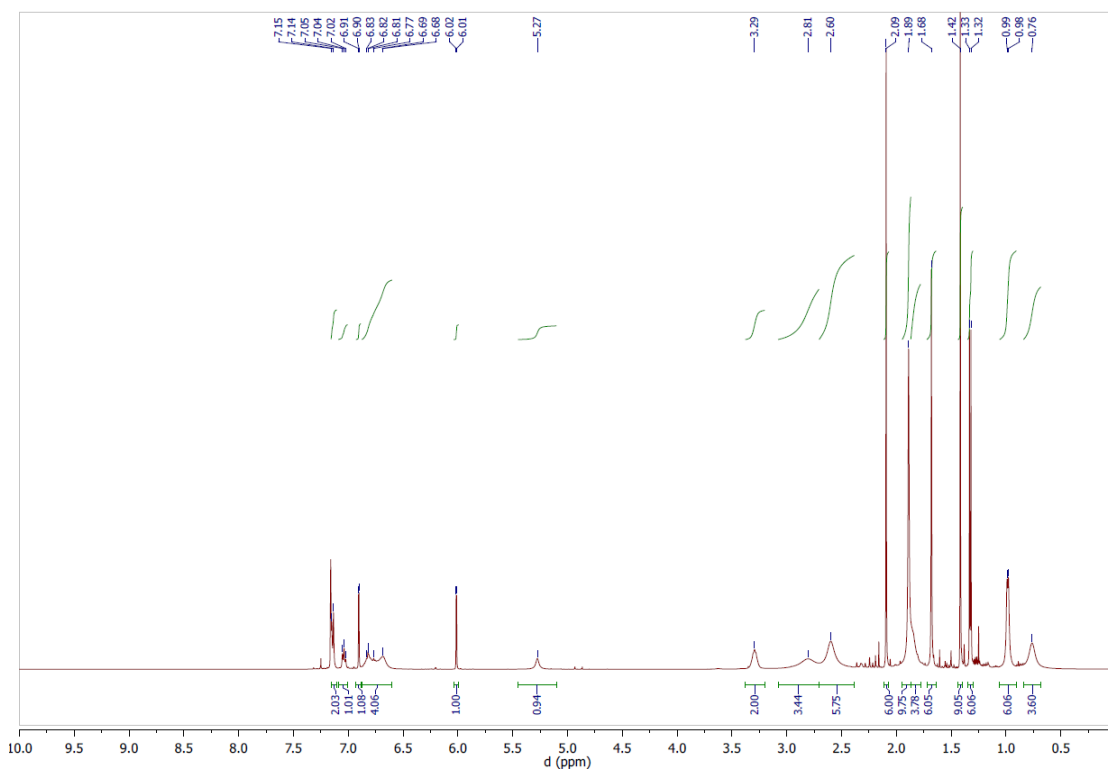

**Figure S8.** The <sup>1</sup>H NMR spectrum of (NacNac<sup>Mes</sup>)Y(AP<sup>dipp</sup>) (**6**) (500 MHz, C<sub>6</sub>D<sub>6</sub>).

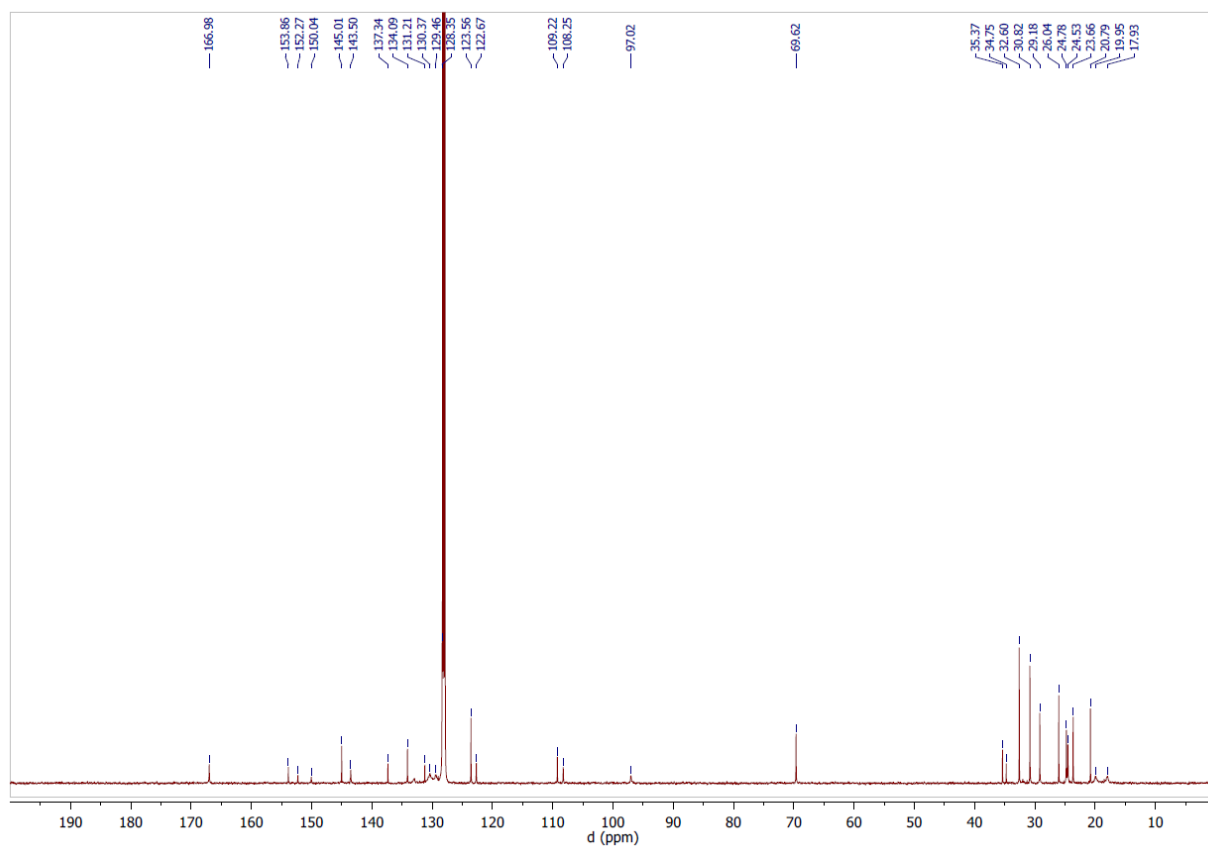

**Figure S9.** The  $^{13}\text{C}\{^1\text{H}\}$  NMR spectrum of  $(\text{NacNac}^{\text{Mes}})\text{Y}(\text{AP}^{\text{dipp}})$  (**6**) (125 MHz,  $\text{C}_6\text{D}_6$ ).

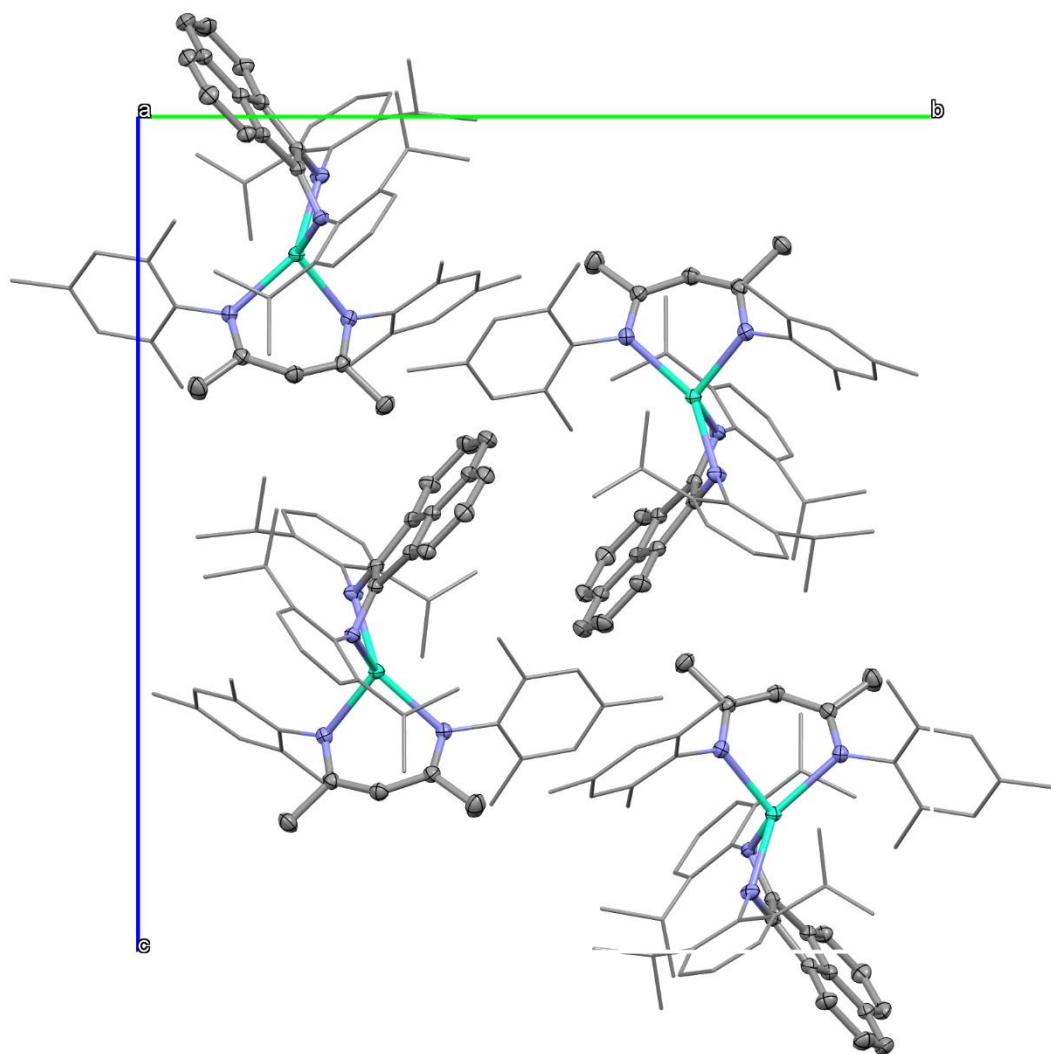

**Figure S10.** Crystal cell of (NacNac<sup>Mes</sup>)Dy(BIAN<sup>dipp</sup>) (**1**) along a axis.

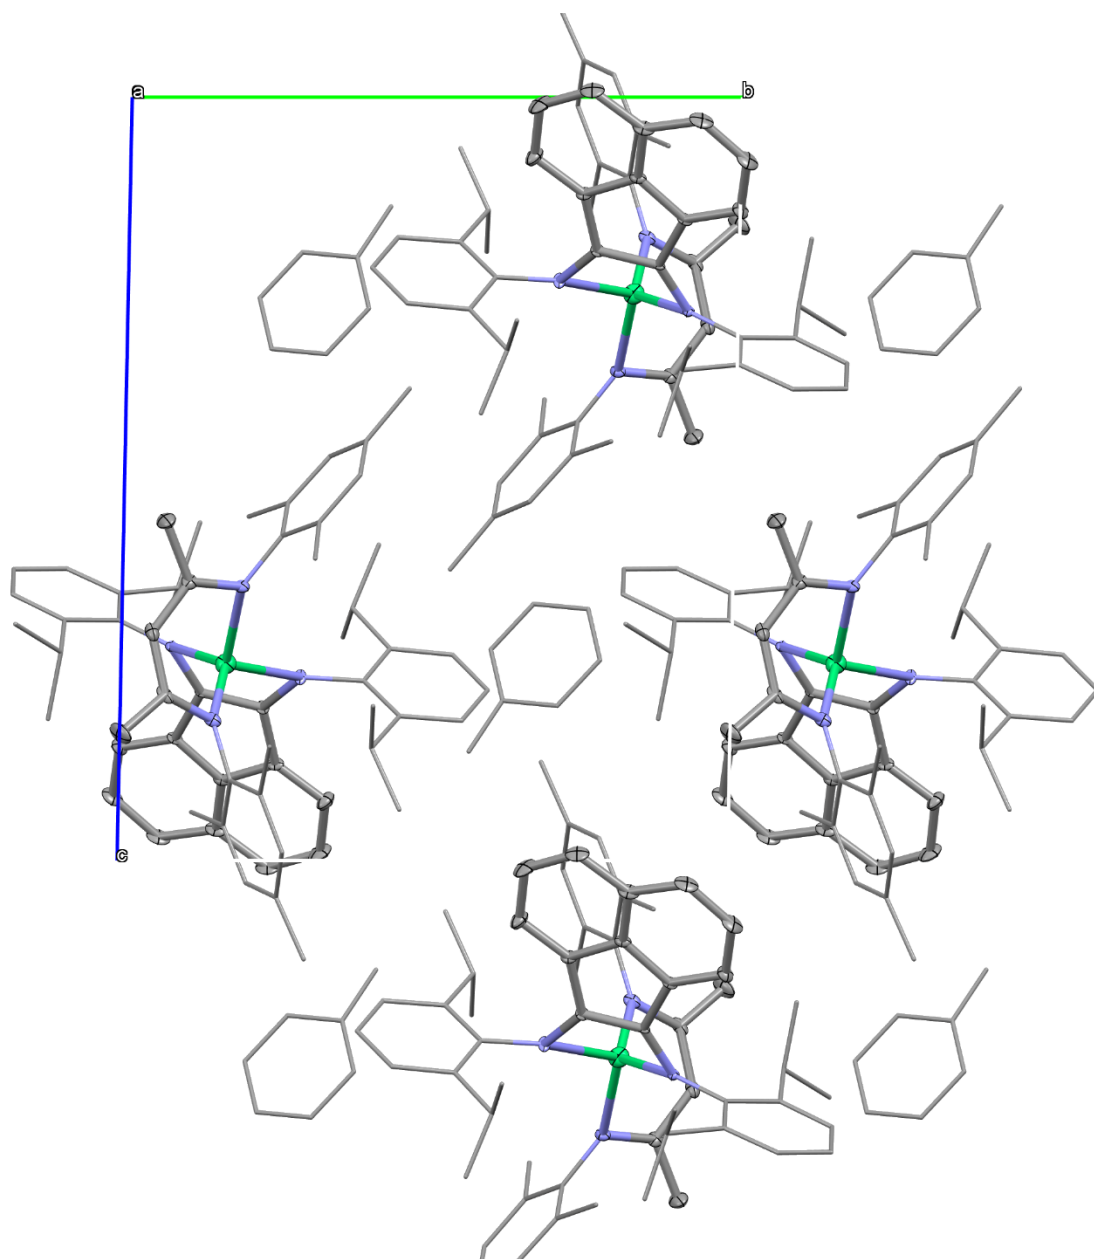

**Figure S11.** Crystal cell of (NacNac<sup>Mes</sup>)Er(BIAN<sup>dipp</sup>)·Toluene (**2**·Toluene) along a axis.



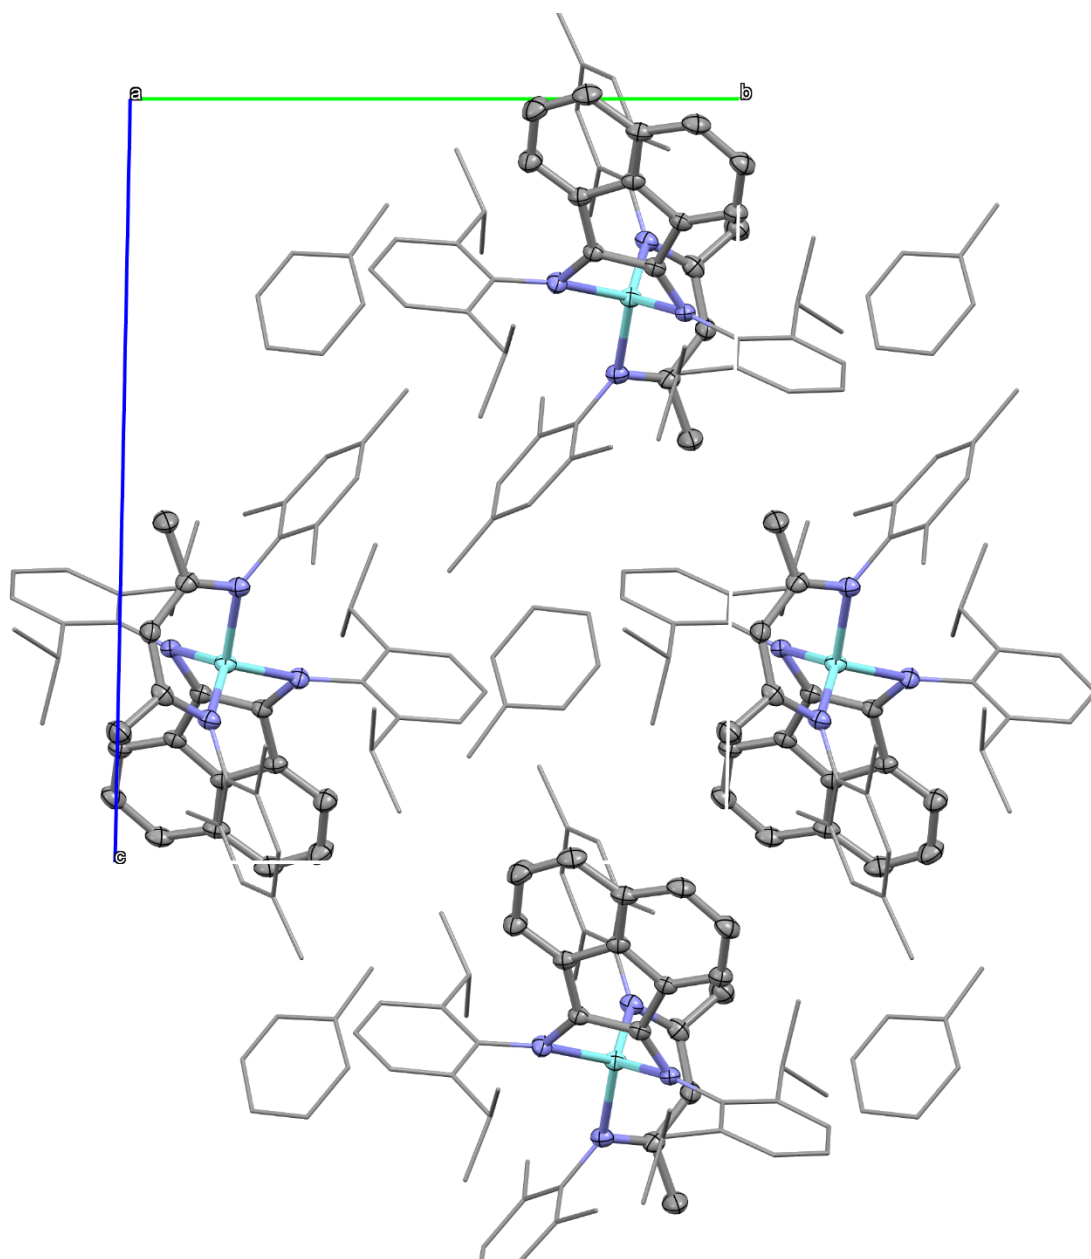

**Figure S12.** Crystal cell of (NacNac<sup>Mes</sup>)Y(BIAN<sup>dipp</sup>)·Toluene (**3**·Toluene) along a axis.

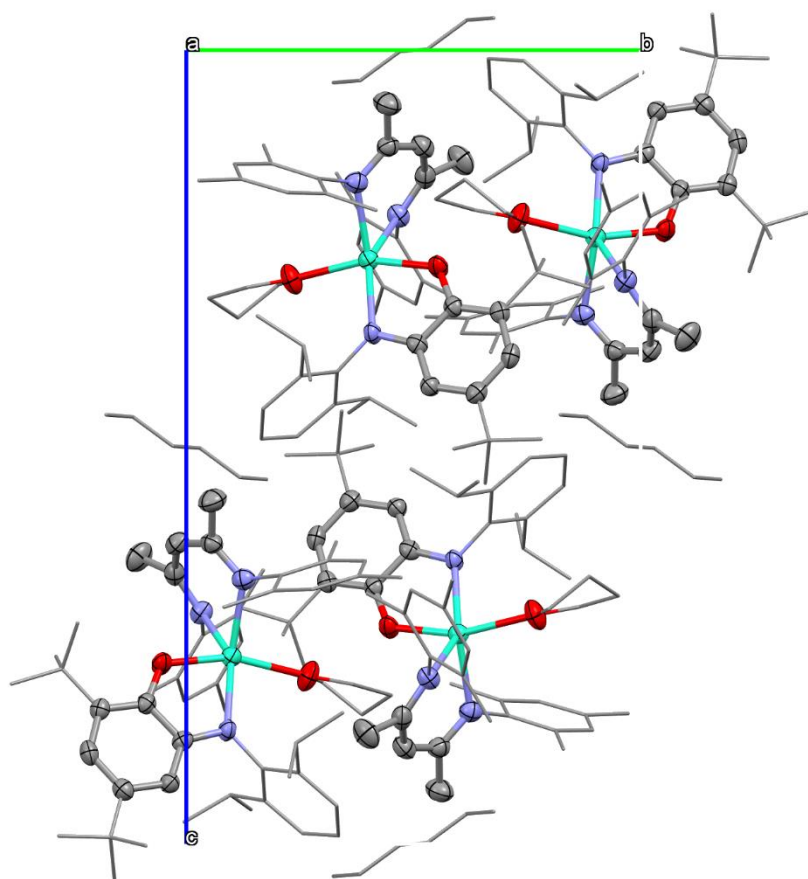

**Figure S13.** Crystal cell of (NacNac<sup>Mes</sup>)Dy(AP<sup>dipp</sup>)(THF)·0.5Hexane (**4**·0.5Hexane) along a axis.

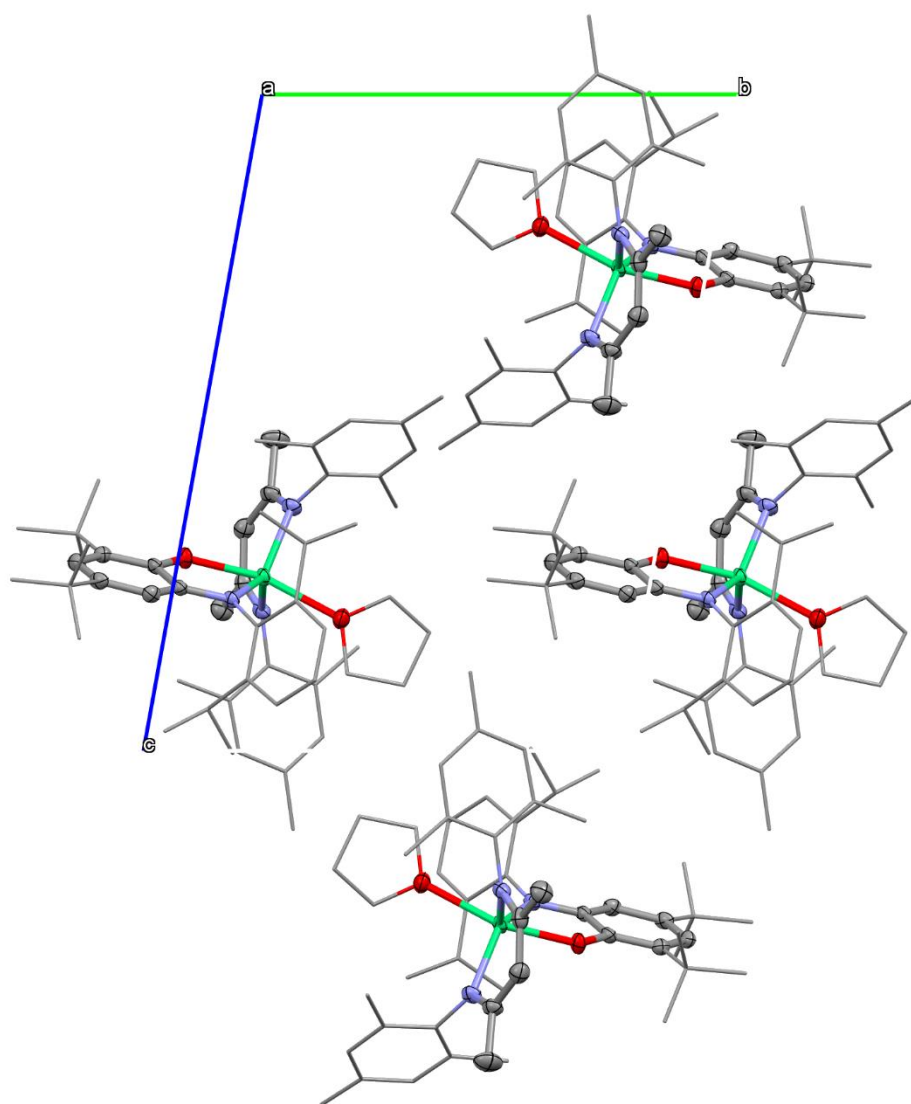

**Figure S14.** Crystal cell of (NacNac<sup>Mes</sup>)Er(AP<sup>dipp</sup>)(THF) (**5**) along a axis.

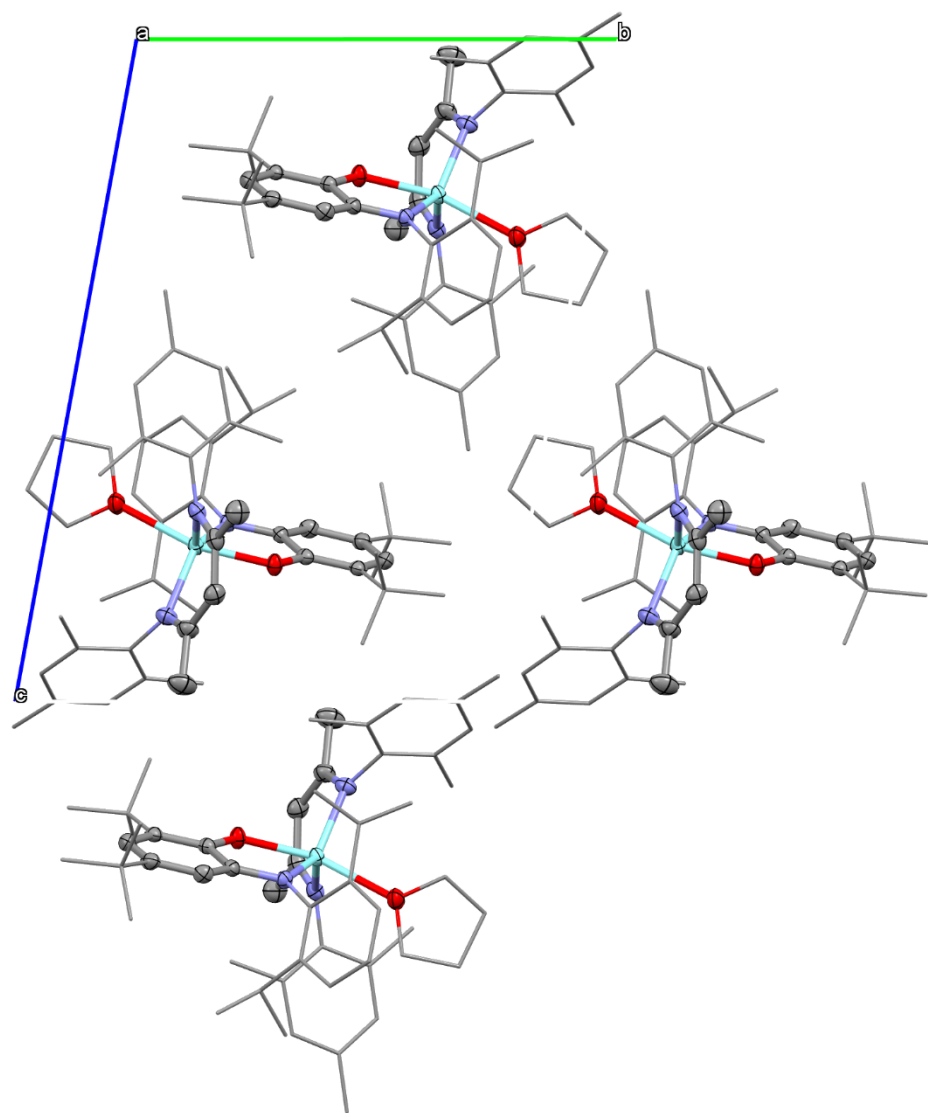

**Figure S15.** Crystal cell of (NacNac<sup>Mes</sup>)Y(AP<sup>dipp</sup>)(THF) (**6**) along a axis.

**Table S1.** Crystal data and structure refinement for the compounds.

| Identification code                         | (NacNac <sup>Mes</sup> )Dy(BIAN <sup>dipp</sup> )                 | (NacNac <sup>Mes</sup> )Er(BIAN <sup>dipp</sup> )·<br>Toluene     | (NacNac <sup>Mes</sup> )Y(BIAN <sup>dipp</sup> )·<br>Toluene      | (NacNac <sup>Mes</sup> )Dy(AP <sup>dipp</sup> )·<br>0.5Hexane     | (NacNac <sup>Mes</sup> )Er(AP <sup>dipp</sup> )                  | (NacNac <sup>Mes</sup> )Y(AP <sup>dipp</sup> )                   |
|---------------------------------------------|-------------------------------------------------------------------|-------------------------------------------------------------------|-------------------------------------------------------------------|-------------------------------------------------------------------|------------------------------------------------------------------|------------------------------------------------------------------|
|                                             | <b>1</b>                                                          | <b>2·Toluene</b>                                                  | <b>3·Toluene</b>                                                  | <b>4·0.5Hexane</b>                                                | <b>5</b>                                                         | <b>6</b>                                                         |
| Empirical formula                           | C <sub>59</sub> H <sub>69</sub> N <sub>4</sub> Dy                 | C <sub>66</sub> H <sub>77</sub> ErN <sub>4</sub>                  | C <sub>66</sub> H <sub>77</sub> N <sub>4</sub> Y                  | C <sub>56</sub> H <sub>81</sub> DyN <sub>3</sub> O <sub>2</sub>   | C <sub>53</sub> H <sub>74</sub> ErN <sub>3</sub> O <sub>2</sub>  | C <sub>53</sub> H <sub>74</sub> N <sub>3</sub> O <sub>2</sub> Y  |
| Formula weight                              | 996.68                                                            | 1093.57                                                           | 1015.22                                                           | 990.73                                                            | 952.41                                                           | 874.06                                                           |
| Temperature / K                             | 150(2)                                                            | 150(2)                                                            | 150(2)                                                            | 200(2)                                                            | 293(2)                                                           | 150(2)                                                           |
| Space group                                 | <i>P</i> 2 <sub>1</sub> / <i>n</i>                                | <i>P</i> -1                                                       | <i>P</i> -1                                                       | <i>P</i> 2 <sub>1</sub> / <i>c</i>                                | <i>P</i> -1                                                      | <i>P</i> -1                                                      |
| a / Å                                       | 12.0680(6)                                                        | 12.2813(2)                                                        | 12.2813(2)                                                        | 19.552(4)                                                         | 11.4962(7)                                                       | 11.534(2)                                                        |
| b / Å                                       | 19.8718(10)                                                       | 13.5420(2)                                                        | 13.5420(2)                                                        | 12.524(3)                                                         | 12.7044(7)                                                       | 12.740(3)                                                        |
| c / Å                                       | 20.9515(11)                                                       | 17.3575(3)                                                        | 17.3575(3)                                                        | 22.503(5)                                                         | 18.1034(10)                                                      | 18.129(4)                                                        |
| α / °                                       | 90                                                                | 90.1890(10)                                                       | 90.1890(10)                                                       | 90                                                                | 95.834(5)                                                        | 95.92(3)                                                         |
| β / °                                       | 93.8582(11)                                                       | 103.1510(10)                                                      | 103.1510(10)                                                      | 103.49(3)                                                         | 106.728(5)                                                       | 106.92(3)                                                        |
| γ / °                                       | 90                                                                | 94.0120(10)                                                       | 94.0120(10)                                                       | 90                                                                | 102.926(5)                                                       | 102.91(3)                                                        |
| Volume / Å <sup>3</sup>                     | 5013.1(4)                                                         | 2803.64(8)                                                        | 2803.64(8)                                                        | 5358(2)                                                           | 2428.6(3)                                                        | 2443.4(10)                                                       |
| Z                                           | 4                                                                 | 2                                                                 | 2                                                                 | 4                                                                 | 2                                                                | 2                                                                |
| ρ <sub>calc</sub> / g·cm <sup>-3</sup>      | 1.321                                                             | 1.295                                                             | 1.203                                                             | 1.228                                                             | 1.302                                                            | 1.188                                                            |
| μ / mm <sup>-1</sup>                        | 1.532                                                             | 1.540                                                             | 1.083                                                             | 1.435                                                             | 1.769                                                            | 1.234                                                            |
| F(000)                                      | 2068.0                                                            | 1138.0                                                            | 1080.0                                                            | 2080.0                                                            | 994.0                                                            | 936.0                                                            |
| Crystal size / mm <sup>3</sup>              | 0.12 × 0.1 × 0.1                                                  | 0.4 × 0.1 × 0.1                                                   | 0.4 × 0.15 × 0.15                                                 | 0.18 × 0.15 × 0.15                                                | 0.2 × 0.15 × 0.12                                                | 0.14 × 0.12 × 0.1                                                |
| Radiation                                   | MoKα (λ = 0.71073)                                                | MoKα (λ = 0.71073)                                               | MoKα (λ = 0.71073)                                               |
| 2θ range / °                                | 3.788 to 55.024                                                   | 2.41 to 51.472                                                    | 3.414 to 51.59                                                    | 3.722 to 51.36                                                    | 3.342 to 51.86                                                   | 3.334 to 50.7                                                    |
| Index ranges                                | -15 ≤ h ≤ 15,                                                     | -14 ≤ h ≤ 14,                                                     | -14 ≤ h ≤ 14,                                                     | -23 ≤ h ≤ 23,                                                     | -14 ≤ h ≤ 13,                                                    | -13 ≤ h ≤ 13,                                                    |
|                                             | -25 ≤ k ≤ 25,                                                     | -16 ≤ k ≤ 16,                                                     | -16 ≤ k ≤ 13,                                                     | -15 ≤ k ≤ 15,                                                     | -15 ≤ k ≤ 14,                                                    | -14 ≤ k ≤ 15,                                                    |
|                                             | -27 ≤ l ≤ 27                                                      | -21 ≤ l ≤ 21                                                      | -21 ≤ l ≤ 21                                                      | -27 ≤ l ≤ 27                                                      | -22 ≤ l ≤ 22                                                     | -21 ≤ l ≤ 19                                                     |
| Reflections collected                       | 44314                                                             | 31457                                                             | 25464                                                             | 32333                                                             | 22296                                                            | 18596                                                            |
| Independent reflections                     | 11509 [R <sub>int</sub> = 0.0219,<br>R <sub>sigma</sub> = 0.0189] | 10606 [R <sub>int</sub> = 0.0346,<br>R <sub>sigma</sub> = 0.0387] | 10533 [R <sub>int</sub> = 0.0425,<br>R <sub>sigma</sub> = 0.0670] | 10166 [R <sub>int</sub> = 0.1093,<br>R <sub>sigma</sub> = 0.1030] | 9055 [R <sub>int</sub> = 0.0753,<br>R <sub>sigma</sub> = 0.0766] | 8903 [R <sub>int</sub> = 0.0700,<br>R <sub>sigma</sub> = 0.1064] |
| Data/restraints/parameters                  | 11509/0/582                                                       | 10606/12/628                                                      | 10533/45/651                                                      | 10166/42/598                                                      | 9055/0/550                                                       | 8903/0/550                                                       |
| Goodness-of-fit on F <sup>2</sup>           | 1.046                                                             | 1.073                                                             | 1.033                                                             | 0.883                                                             | 0.946                                                            | 0.884                                                            |
| Final R indexes [I ≥ 2σ (I)]                | R <sub>1</sub> = 0.0217,<br>wR <sub>2</sub> = 0.0540              | R <sub>1</sub> = 0.0435,<br>wR <sub>2</sub> = 0.1238              | R <sub>1</sub> = 0.0449,<br>wR <sub>2</sub> = 0.1041              | R <sub>1</sub> = 0.0416,<br>wR <sub>2</sub> = 0.0866              | R <sub>1</sub> = 0.0374,<br>wR <sub>2</sub> = 0.0767             | R <sub>1</sub> = 0.0459,<br>wR <sub>2</sub> = 0.0836             |
| Final R indexes [all data]                  | R <sub>1</sub> = 0.0263,<br>wR <sub>2</sub> = 0.0553              | R <sub>1</sub> = 0.0481,<br>wR <sub>2</sub> = 0.1275              | R <sub>1</sub> = 0.0685,<br>wR <sub>2</sub> = 0.1128              | R <sub>1</sub> = 0.0739,<br>wR <sub>2</sub> = 0.0930              | R <sub>1</sub> = 0.0459,<br>wR <sub>2</sub> = 0.0784             | R <sub>1</sub> = 0.0799,<br>wR <sub>2</sub> = 0.0921             |
| Largest diff. peak/hole / e·Å <sup>-3</sup> | 0.65/-0.37                                                        | 1.69/-0.71                                                        | 0.69/-0.50                                                        | 0.81/-0.85                                                        | 1.11/-1.60                                                       | 0.58/-0.40                                                       |

**Table S2.** Geometry analysis of the tetracoordinated lanthanide polyhedra in complexes **1–3** by SHAPE program\*

|                   | D <sub>4h</sub> (Square) | T <sub>d</sub> (Tetrahedron) | C <sub>2v</sub> (Seesaw) | C <sub>3v</sub> (Vacant trigonal bipyramid) |
|-------------------|--------------------------|------------------------------|--------------------------|---------------------------------------------|
| <b>1</b>          | 23.11                    | 5.78                         | 7.56                     | 6.81                                        |
| <b>2</b> ·Toluene | 24.87                    | 6.73                         | 7.65                     | 8.44                                        |
| <b>3</b> ·Toluene | 25.30                    | 5.50                         | 7.58                     | 7.50                                        |

\*SHAPE 2.1 program for the stereochemical analysis of molecular fragments by means of Continuous Shape Measures and associated tools. Llunell, M.; Casanova, D.; Girera, J.; Alemany, P.; Alvarez, S. SHAPE, version 2.1; Universitat de Barcelona: Barcelona, Spain, 2013. <http://www.ee.ub.edu/>

**Table S3.** Geometry analysis of the pentacoordinated lanthanide polyhedra in complexes **4–6** by SHAPE program\*

|                     | D <sub>5h</sub> (Pentagon) | C <sub>4v</sub> (Vacant octahedron) | D <sub>3h</sub> (Trigonal bipyramid) | C <sub>4v</sub> (Spherical square pyramid) | D <sub>3h</sub> (Johnson trigonal bipyramid J12) |
|---------------------|----------------------------|-------------------------------------|--------------------------------------|--------------------------------------------|--------------------------------------------------|
| <b>4</b> ·0.5Hexane | 24.11                      | 5.40                                | 6.54                                 | 4.53                                       | 9.01                                             |
| <b>5</b>            | 23.69                      | 6.79                                | 5.78                                 | 5.20                                       | 8.49                                             |
| <b>6</b>            | 23.47                      | 6.94                                | 6.03                                 | 5.37                                       | 8.73                                             |

\*SHAPE 2.1 program for the stereochemical analysis of molecular fragments by means of Continuous Shape Measures and associated tools. Llunell, M.; Casanova, D.; Girera, J.; Alemany, P.; Alvarez, S. SHAPE, version 2.1; Universitat de Barcelona: Barcelona, Spain, 2013. <http://www.ee.ub.edu/>

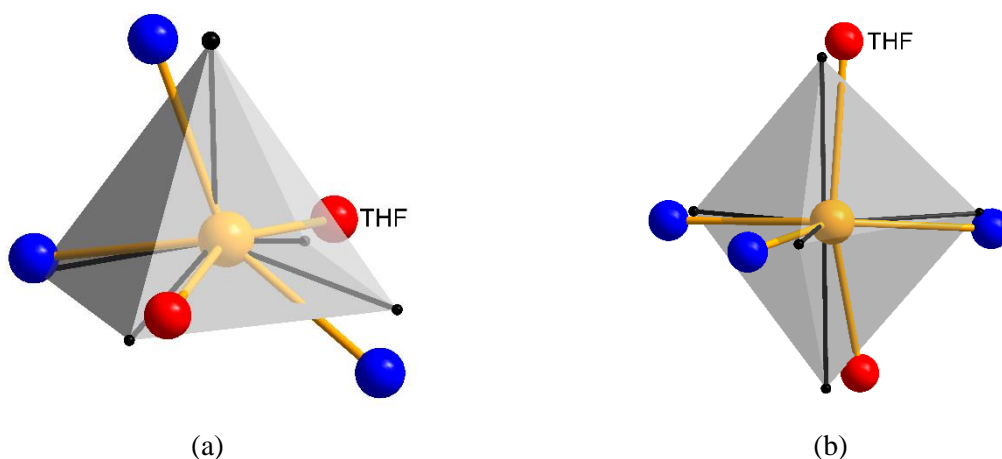

**Figure S16.** Overlay of the coordination polyhedron in complexes **4–6** (by the example of **6**) and regular spherical square pyramid (a) and trigonal bipyramid (b) according to Continuous Shape Measures routine implemented in SHAPE program.
